# Supplementary material for: Variability in epilimnion depth estimations in lakes
Source: Copernicus journal article supplement (doi:10.5194/hess-24-5559-2020), 2020-11-24
Supplement: Supplementary file 1 [file hess-24-5559-2020-supplement.pdf]

Supplement of Hydrol. Earth Syst. Sci., 24, 5559–5577, 2020  
<https://doi.org/10.5194/hess-24-5559-2020-supplement>  
© Author(s) 2020. This work is distributed under  
the Creative Commons Attribution 4.0 License.

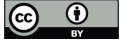

*Supplement of*

## **Variability in epilimnion depth estimations in lakes**

**Harriet L. Wilson et al.**

*Correspondence to:* Harriet L. Wilson (wilsonh@dkit.ie)

The copyright of individual parts of the supplement might differ from the CC BY 4.0 License.

## Supplementary material of HESS-2020-222

**Table S1.** Lake model parameters and calibrated values.

| Parameter   | Lake Erken | Lough Feeagh |
|-------------|------------|--------------|
| Shf_factor  | 0.88       | 0.77         |
| Swr_factor  | 0.98       | 0.93         |
| Wind_factor | 1.41       | 1.31         |
| K_min       | 1.86e-6    | 3.48e-6      |
| G2          | 2.14       | 0.56         |

**Table S2:** Pearson’s correlation coefficient (r) matrices for all methods and all threshold combinations for Lough Feeagh and Lake Erken.

| Lough Feeagh |          |      |      |     |      |      |      |     |          | Lough Feeagh |      |     |      |      |      |     |          |      |      | Lough Feeagh |      |      |      |     |          |      |      |      |      | Lough Feeagh |      |      |  |  |  |  |  |  |  |
|--------------|----------|------|------|-----|------|------|------|-----|----------|--------------|------|-----|------|------|------|-----|----------|------|------|--------------|------|------|------|-----|----------|------|------|------|------|--------------|------|------|--|--|--|--|--|--|--|
|              | Method 1 |      |      |     |      |      |      |     | Method 2 |              |      |     |      |      |      |     | Method 3 |      |      |              |      |      |      |     | Method 4 |      |      |      |      |              |      |      |  |  |  |  |  |  |  |
|              | 0.03     | 0.05 | 0.08 | 0.1 | 0.13 | 0.15 | 0.18 | 0.2 | 0.03     | 0.05         | 0.08 | 0.1 | 0.13 | 0.15 | 0.18 | 0.2 | 0.03     | 0.05 | 0.08 | 0.1          | 0.13 | 0.15 | 0.18 | 0.2 | 0.03     | 0.05 | 0.08 | 0.1  | 0.13 | 0.15         | 0.18 | 0.2  |  |  |  |  |  |  |  |
| Method 1     | 0.025    |      |      |     |      |      |      |     |          |              |      |     |      |      |      |     |          |      |      |              |      |      |      |     |          |      |      |      |      |              |      |      |  |  |  |  |  |  |  |
|              | 0.05     | .59  |      |     |      |      |      |     |          |              |      |     |      |      |      |     |          |      |      |              |      |      |      |     |          |      |      |      |      |              |      |      |  |  |  |  |  |  |  |
|              | 0.075    | .46  | .82  |     |      |      |      |     |          |              |      |     |      |      |      |     |          |      |      |              |      |      |      |     |          |      |      |      |      |              |      |      |  |  |  |  |  |  |  |
|              | 0.1      | .42  | .76  | .95 |      |      |      |     |          |              |      |     |      |      |      |     |          |      |      |              |      |      |      |     |          |      |      |      |      |              |      |      |  |  |  |  |  |  |  |
|              | 0.125    | .41  | .73  | .91 | .98  |      |      |     |          |              |      |     |      |      |      |     |          |      |      |              |      |      |      |     |          |      |      |      |      |              |      |      |  |  |  |  |  |  |  |
|              | 0.15     | .39  | .71  | .89 | .95  | .99  |      |     |          |              |      |     |      |      |      |     |          |      |      |              |      |      |      |     |          |      |      |      |      |              |      |      |  |  |  |  |  |  |  |
| Method 2     | 0.025    | .41  | .68  | .73 | .74  | .76  | .78  | .79 | .79      |              |      |     |      |      |      |     |          |      |      |              |      |      |      |     |          |      |      |      |      |              |      |      |  |  |  |  |  |  |  |
|              | 0.05     | .26  | .48  | .61 | .65  | .68  | .70  | .72 | .74      | .64          |      |     |      |      |      |     |          |      |      |              |      |      |      |     |          |      |      |      |      |              |      |      |  |  |  |  |  |  |  |
|              | 0.075    | .16  | .30  | .39 | .43  | .46  | .49  | .51 | .53      | .40          | .67  |     |      |      |      |     |          |      |      |              |      |      |      |     |          |      |      |      |      |              |      |      |  |  |  |  |  |  |  |
|              | 0.1      | .11  | .22  | .29 | .33  | .36  | .38  | .40 | .42      | .30          | .51  | .77 |      |      |      |     |          |      |      |              |      |      |      |     |          |      |      |      |      |              |      |      |  |  |  |  |  |  |  |
|              | 0.125    | .08  | .16  | .22 | .25  | .27  | .29  | .30 | .32      | .22          | .38  | .58 | .75  |      |      |     |          |      |      |              |      |      |      |     |          |      |      |      |      |              |      |      |  |  |  |  |  |  |  |
|              | 0.15     | .07  | .13  | .17 | .21  | .23  | .24  | .25 | .26      | .18          | .31  | .46 | .60  | .79  |      |     |          |      |      |              |      |      |      |     |          |      |      |      |      |              |      |      |  |  |  |  |  |  |  |
| Method 3     | 0.025    | .39  | .64  | .68 | .71  | .74  | .77  | .78 | .79      | .94          | .61  | .43 | .34  | .26  | .22  | .19 | .16      |      |      |              |      |      |      |     |          |      |      |      |      |              |      |      |  |  |  |  |  |  |  |
|              | 0.05     | .25  | .46  | .58 | .63  | .66  | .68  | .70 | .72      | .61          | .95  | .71 | .55  | .42  | .34  | .28 | .24      | .61  |      |              |      |      |      |     |          |      |      |      |      |              |      |      |  |  |  |  |  |  |  |
|              | 0.075    | .15  | .28  | .37 | .42  | .45  | .48  | .50 | .52      | .38          | .64  | .97 | .80  | .60  | .48  | .40 | .34      | .43  | .69  |              |      |      |      |     |          |      |      |      |      |              |      |      |  |  |  |  |  |  |  |
|              | 0.1      | .11  | .21  | .27 | .31  | .34  | .36  | .38 | .40      | .29          | .49  | .73 | .95  | .79  | .63  | .53 | .45      | .33  | .53  | .76          |      |      |      |     |          |      |      |      |      |              |      |      |  |  |  |  |  |  |  |
|              | 0.125    | .08  | .15  | .20 | .23  | .26  | .27  | .29 | .30      | .21          | .36  | .54 | .70  | .94  | .85  | .71 | .61      | .25  | .39  | .56          | .74  |      |      |     |          |      |      |      |      |              |      |      |  |  |  |  |  |  |  |
|              | 0.15     | .07  | .12  | .16 | .20  | .21  | .23  | .24 | .25      | .17          | .29  | .43 | .56  | .75  | .94  | .88 | .75      | .21  | .32  | .45          | .60  | .81  |      |     |          |      |      |      |      |              |      |      |  |  |  |  |  |  |  |
| Method 4     | 0.025    | .39  | .67  | .78 | .77  | .74  | .70  | .67 | .65      | .53          | .44  | .32 | .26  | .22  | .20  | .18 | .15      | .38  | .45  | .32          | .25  | .21  | .19  | .17 | .15      | .99  | 1.00 |      |      |              |      |      |  |  |  |  |  |  |  |
|              | 0.05     | .39  | .67  | .78 | .77  | .73  | .70  | .67 | .65      | .53          | .44  | .32 | .26  | .22  | .20  | .18 | .15      | .38  | .45  | .32          | .25  | .21  | .19  | .17 | .15      | .99  | 1.00 | 1.00 |      |              |      |      |  |  |  |  |  |  |  |
|              | 0.075    | .39  | .67  | .78 | .77  | .73  | .70  | .67 | .65      | .53          | .44  | .32 | .26  | .22  | .20  | .18 | .15      | .38  | .45  | .32          | .25  | .21  | .19  | .17 | .15      | .99  | 1.00 | 1.00 | 1.00 |              |      |      |  |  |  |  |  |  |  |
|              | 0.1      | .39  | .67  | .78 | .77  | .73  | .70  | .67 | .65      | .53          | .44  | .32 | .26  | .22  | .20  | .18 | .15      | .38  | .45  | .32          | .25  | .21  | .19  | .17 | .15      | .99  | 1.00 | 1.00 | 1.00 | 1.00         |      |      |  |  |  |  |  |  |  |
|              | 0.125    | .39  | .67  | .78 | .77  | .73  | .70  | .67 | .65      | .53          | .44  | .32 | .26  | .22  | .20  | .18 | .15      | .38  | .45  | .32          | .25  | .21  | .19  | .17 | .15      | .99  | 1.00 | 1.00 | 1.00 | 1.00         |      |      |  |  |  |  |  |  |  |
|              | 0.15     | .39  | .67  | .78 | .77  | .73  | .70  | .67 | .65      | .53          | .44  | .32 | .26  | .22  | .20  | .18 | .15      | .38  | .45  | .32          | .25  | .21  | .19  | .17 | .15      | .99  | 1.00 | 1.00 | 1.00 | 1.00         | 1.00 | 1.00 |  |  |  |  |  |  |  |
| Method 1     | 0.025    |      |      |     |      |      |      |     |          |              |      |     |      |      |      |     |          |      |      |              |      |      |      |     |          |      |      |      |      |              |      |      |  |  |  |  |  |  |  |
|              | 0.05     | .94  |      |     |      |      |      |     |          |              |      |     |      |      |      |     |          |      |      |              |      |      |      |     |          |      |      |      |      |              |      |      |  |  |  |  |  |  |  |
|              | 0.075    | .89  | .97  |     |      |      |      |     |          |              |      |     |      |      |      |     |          |      |      |              |      |      |      |     |          |      |      |      |      |              |      |      |  |  |  |  |  |  |  |
|              | 0.1      | .85  | .94  | .98 |      |      |      |     |          |              |      |     |      |      |      |     |          |      |      |              |      |      |      |     |          |      |      |      |      |              |      |      |  |  |  |  |  |  |  |
|              | 0.125    | .82  | .91  | .96 | .99  |      |      |     |          |              |      |     |      |      |      |     |          |      |      |              |      |      |      |     |          |      |      |      |      |              |      |      |  |  |  |  |  |  |  |
|              | 0.15     | .79  | .89  | .94 | .97  | .99  |      |     |          |              |      |     |      |      |      |     |          |      |      |              |      |      |      |     |          |      |      |      |      |              |      |      |  |  |  |  |  |  |  |
| Method 2     | 0.025    | .85  | .92  | .92 | .89  | .87  | .85  | .83 | .81      | .85          | .86  | .82 | .79  | .73  | .69  | .64 | .58      |      |      |              |      |      |      |     |          |      |      |      |      |              |      |      |  |  |  |  |  |  |  |
|              | 0.05     | .78  | .87  | .92 | .94  | .95  | .95  | .95 | .94      | .85          | .90  |     |      |      |      |     |          | .85  |      |              |      |      |      |     |          |      |      |      |      |              |      |      |  |  |  |  |  |  |  |
|              | 0.075    | .70  | .78  | .84 | .87  | .90  | .92  | .92 | .93      | .75          | .90  |     |      |      |      |     |          | .75  | .90  |              |      |      |      |     |          |      |      |      |      |              |      |      |  |  |  |  |  |  |  |
|              | 0.1      | .64  | .73  | .78 | .82  | .85  | .87  | .88 | .89      | .70          | .84  | .94 |      |      |      |     |          | .64  | .77  | .86          | .93  |      |      |     |          |      |      |      |      |              |      |      |  |  |  |  |  |  |  |
|              | 0.125    | .59  | .67  | .72 | .75  | .78  | .81  | .83 | .83      | .64          | .77  | .86 | .93  |      |      |     |          | .64  | .77  | .86          | .93  |      |      |     |          |      |      |      |      |              |      |      |  |  |  |  |  |  |  |
|              | 0.15     | .55  | .62  | .66 | .70  | .73  | .76  | .78 | .80      | .59          | .71  | .80 | .87  | .94  |      |     |          | .59  | .71  | .80          | .87  | .93  |      |     |          |      |      |      |      |              |      |      |  |  |  |  |  |  |  |
| Method 3     | 0.025    | .75  | .83  | .86 | .87  | .88  | .88  | .88 | .88      | .84          | .86  | .82 | .79  | .73  | .69  | .64 | .58      |      |      |              |      |      |      |     |          |      |      |      |      |              |      |      |  |  |  |  |  |  |  |
|              | 0.05     | .72  | .81  | .86 | .89  | .91  | .92  | .93 | .93      | .78          | .92  | .89 | .86  | .81  | .77  | .72 | .66      | .91  |      |              |      |      |      |     |          |      |      |      |      |              |      |      |  |  |  |  |  |  |  |
|              | 0.075    | .66  | .74  | .79 | .83  | .86  | .88  | .90 | .91      | .71          | .85  | .94 | .92  | .88  | .84  | .78 | .72      | .83  | .92  |              |      |      |      |     |          |      |      |      |      |              |      |      |  |  |  |  |  |  |  |
|              | 0.1      | .62  | .70  | .75 | .78  | .82  | .84  | .86 | .87      | .67          | .80  | .90 | .96  | .92  | .88  | .82 | .77      | .79  | .88  | .95          |      |      |      |     |          |      |      |      |      |              |      |      |  |  |  |  |  |  |  |
|              | 0.125    | .58  | .65  | .70 | .73  | .76  | .79  | .81 | .83      | .63          | .75  | .84 | .90  | .97  | .94  | .88 | .82      | .73  | .82  | .89          | .94  |      |      |     |          |      |      |      |      |              |      |      |  |  |  |  |  |  |  |
|              | 0.15     | .53  | .61  | .65 | .68  | .71  | .73  | .76 | .78      | .58          | .69  | .78 | .84  | .91  | .97  | .93 | .87      | .68  | .76  | .84          | .88  | .94  |      |     |          |      |      |      |      |              |      |      |  |  |  |  |  |  |  |
| Method 4     | 0.025    | .78  | .83  | .86 | .88  | .88  | .88  | .88 | .88      | .84          | .86  | .82 | .79  | .74  | .70  | .65 | .59      | .90  | .90  | .84          | .80  | .74  | .69  | .64 | .58      | .99  |      |      |      |              |      |      |  |  |  |  |  |  |  |
|              | 0.05     | .76  | .81  | .83 | .85  | .86  | .86  | .86 | .86      | .74          | .82  | .81 | .79  | .75  | .71  | .66 | .61      | .88  | .90  | .85          | .81  | .76  | .71  | .65 | .60      | .99  | 1.00 |      |      |              |      |      |  |  |  |  |  |  |  |
|              | 0.075    | .74  | .79  | .82 | .83  | .84  | .84  | .84 | .84      | .72          | .80  | .79 | .78  | .74  | .71  | .66 | .62      | .86  | .88  | .85          | .81  | .76  | .71  | .66 | .61      | .98  | .99  | 1.00 |      |              |      |      |  |  |  |  |  |  |  |
|              | 0.1      | .73  | .78  | .81 | .82  | .83  | .83  | .83 | .83      | .71          | .79  | .78 | .76  | .73  | .70  | .66 | .62      | .85  | .87  | .83          | .80  | .75  | .71  | .66 | .61      | .97  | .99  | 1.00 |      |              |      |      |  |  |  |  |  |  |  |
|              | 0.125    | .73  | .77  | .80 | .81  | .82  | .82  | .82 | .82      | .70          | .78  | .77 | .75  | .72  | .70  | .66 | .61      | .84  | .86  | .82          | .79  | .74  | .70  | .66 | .61      | .96  | .98  | .99  | 1.00 |              |      |      |  |  |  |  |  |  |  |
|              | 0.15     | .72  | .77  | .79 | .81  | .81  | .81  | .81 | .81      | .69          | .77  | .75 | .74  | .71  | .69  | .65 | .61      | .84  | .86  | .81          | .78  | .73  | .69  | .65 | .61      | .96  | .98  | .99  | 1.00 | 1.00         |      |      |  |  |  |  |  |  |  |

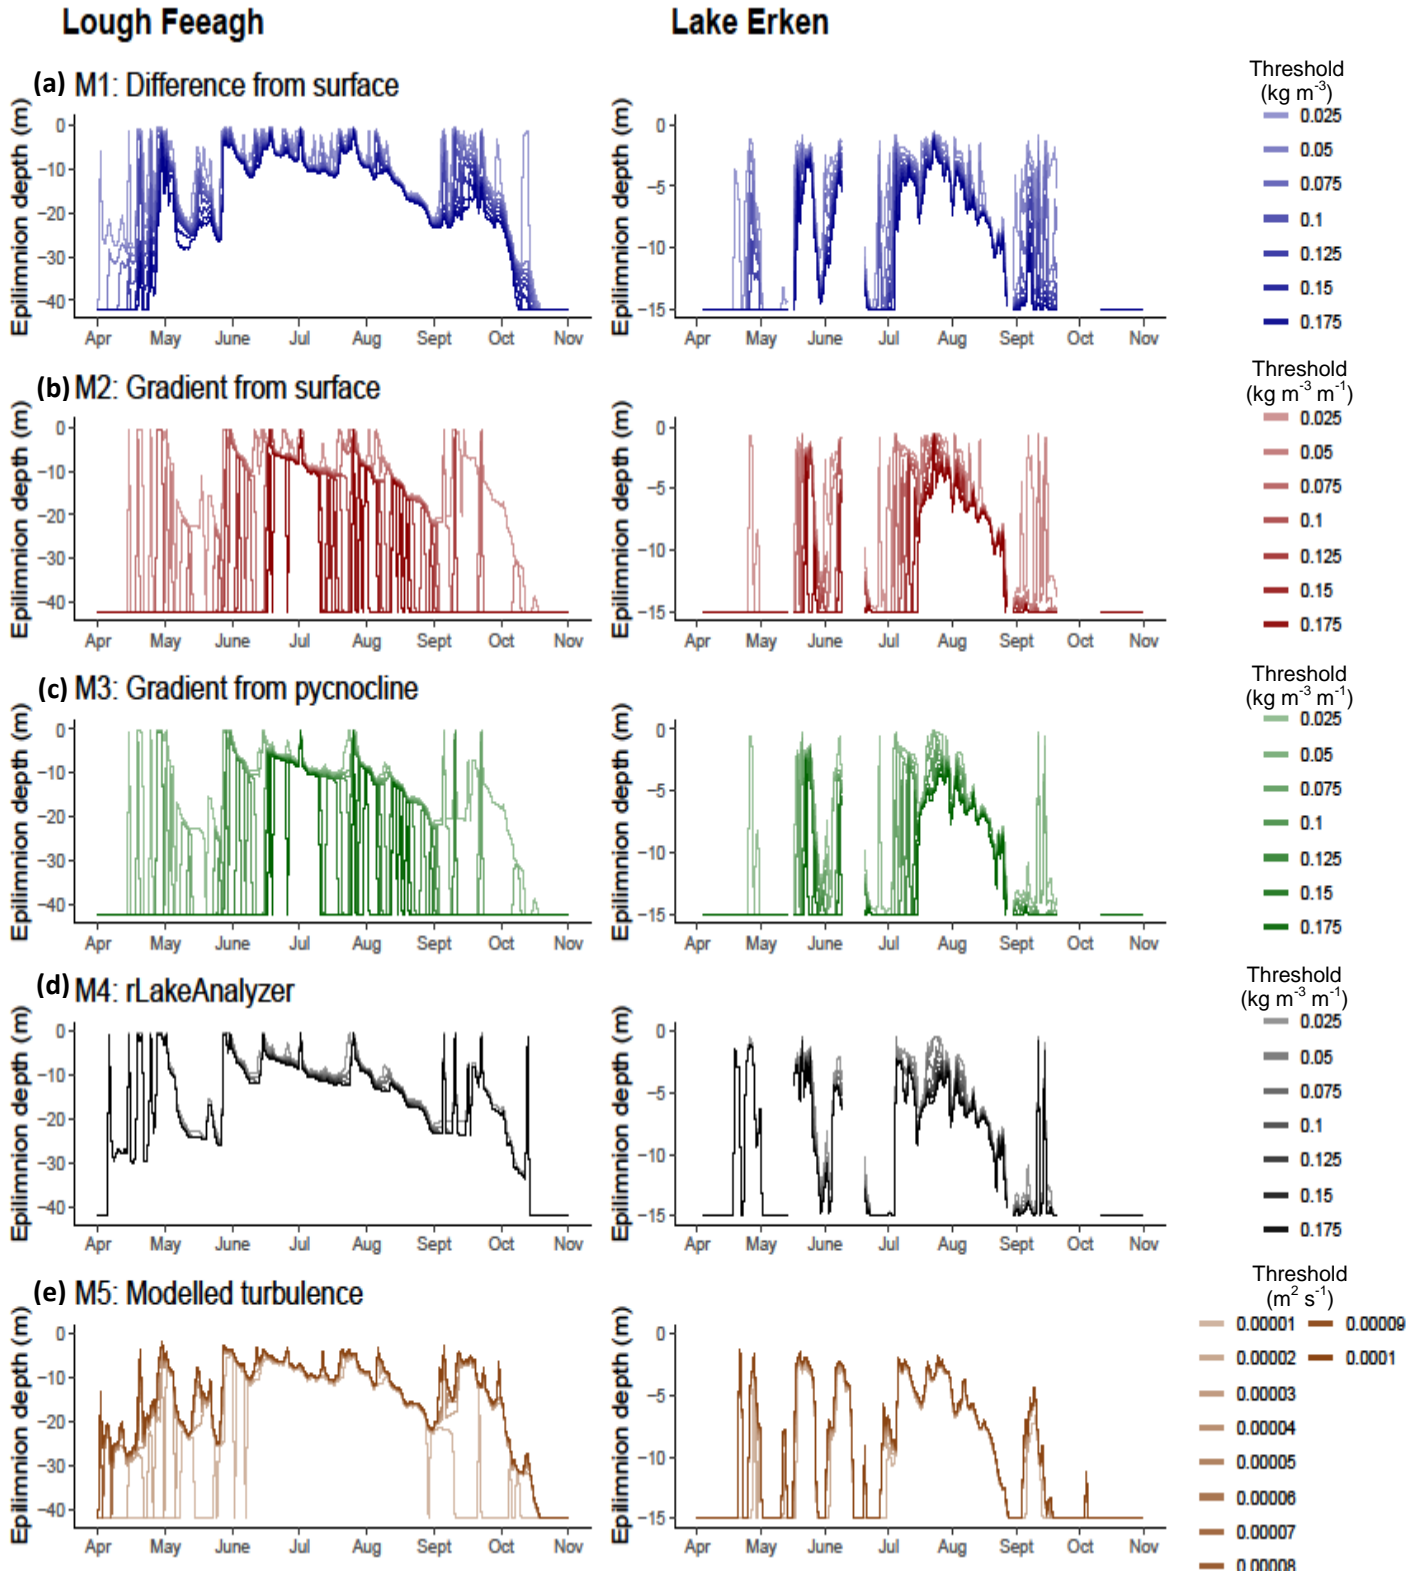

**Figure S1:** Daily epilimnion depth estimates using modelled data for 2016 from Lough Feeagh and Lake Erken, showing estimates from all profile based epilimnion depth methods, including M1, the absolute difference from the surface method (a), M2, the gradient from the surface method (b), M3, the gradient from the pycnocline method (c) and M4, the rLakeAnalyzer method (d), as well as M5, the modelled turbulence based method (e), calculated using the full range of thresholds, and for each lake.
